# Supplementary material for: Bv8/prokineticin 2 is involved in Aβ-induced neurotoxicity
Source: PubMed Central journal article supplement (PMC4610025; doi:10.1038/srep15301), 2015-10-19
Supplement: srep15301-s3.pdf [file srep15301-s3.pdf]

**Bv8/prokineticin 2 is involved in A $\beta$ -induced neurotoxicity** by Severini Cinzia Lattanzi Roberta, Maftai Daniela, Marconi Veronica, Ciotti Maria Teresa, Petrocchi Passeri Pamela, Florenzano Fulvio, Del Duca Ester, Caioli Silvia, Zona Cristina, Balboni Gianfranco, Salvadori Severo, Nisticò Robert, Negri Lucia

### Additional Figure 3

#### A $\beta$ <sub>1-42</sub> aggregation

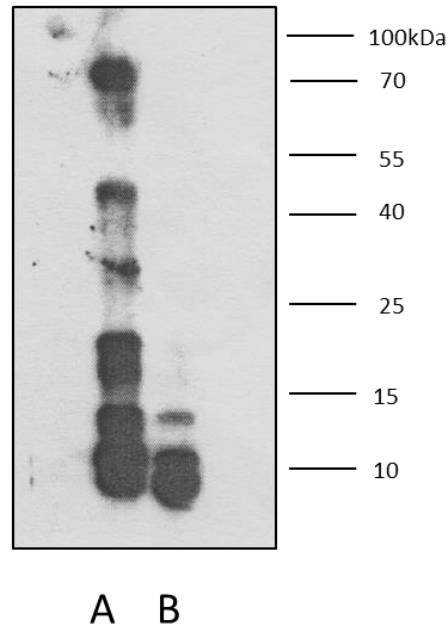

A= aggregated form (72h)  
B= non-aggregated form
